# Supplementary material for: Revisiting paramagnetic relaxation enhancements in slowly rotatingsystems: how long is the long range?
Source: Copernicus journal article supplement (doi:10.5194/mr-2020-33), 2020-12-03
Supplement: Supplementary file 1 [file mr-2020-33-supplement.pdf]

## The CORMA approach

The time dependence of the longitudinal magnetization due to the dipole-dipole interaction between two magnetically unlike spins  $I$  and  $J$  of equal spin quantum number ( $I=J$ ) is described by (Bertini et al., 2017; Solomon, 1955)

$$\frac{dM_z^I}{dt} = -\rho^I (M_z^I - M_{eq}^I) - \sigma^{IJ} (M_z^J - M_{eq}^J) \quad (S1a)$$

$$\frac{dM_z^J}{dt} = -\rho^J (M_z^J - M_{eq}^J) - \sigma^{JI} (M_z^I - M_{eq}^I) \quad (S1b)$$

where  $M_{eq}$  is the equilibrium magnetization, with

$$\rho^I = w_0 + 2w_1^I + w_2 \quad (S2a)$$

$$\rho^J = w_0 + 2w_1^J + w_2 \quad (S2b)$$

$$\sigma^{IJ} = \sigma^{JI} = w_2 - w_0. \quad (S3)$$

The terms  $w_0$ ,  $w_1$  and  $w_2$  indicate the zero, single and double quantum spin transition probabilities, respectively:  $w_0$  is the probability of transition simultaneously causing a decrease in  $m_I$  and an increase in  $m_J$ , or vice versa (zero quantum transitions), and is equal to

$$w_0 = \frac{2}{15} \left( \frac{\mu_0}{4\pi} \frac{\hbar^2 \gamma_I \gamma_J}{r_{IJ}^3} \right)^2 J(J+1) \frac{\tau_c}{1 + (\omega_I - \omega_J)^2 \tau_c^2} \quad (S4)$$

where  $r_{IJ}$  is the internuclear distance;  $w_1^I$  is the probability of single transitions between states with the same  $m_J$  and different  $m_I$  (single quantum transitions)

$$w_1^I = \frac{1}{5} \left( \frac{\mu_0}{4\pi} \frac{\hbar^2 \gamma_I \gamma_J}{r_{IJ}^3} \right)^2 J(J+1) \frac{\tau_c}{1 + \omega_I^2 \tau_c^2} \quad (S5)$$

and  $w_2$  indicates the probabilities of transitions causing a decrease, or an increase, in both  $m_I$  and  $m_J$  (double quantum transitions)

$$w_2 = \frac{4}{5} \left( \frac{\mu_0}{4\pi} \frac{\hbar^2 \gamma_I \gamma_J}{r_{IJ}^3} \right)^2 J(J+1) \frac{\tau_c}{1 + (\omega_I + \omega_J)^2 \tau_c^2} \quad (\text{S6})$$

In the assumption of a completely rigid spherical molecule, the correlation time  $\tau_c$  is the isotropic molecular reorientation time.

The cross relaxation rates  $\sigma^{IJ} = \sigma^{JI}$  describe the effect on the variation of the magnetization of one spin due to the variation of the magnetization of the other spin, resulting from their interaction.

By definition of a magnetization vector  $\mathbf{M} = \begin{pmatrix} M_z^I \\ M_z^J \end{pmatrix}$  and of a relaxation matrix  $\mathbf{R} = \begin{pmatrix} \rho^I & \sigma^{IJ} \\ \sigma^{JI} & \rho^J \end{pmatrix}$ ,

Eqs. 1 can be written in the matrix form

$$\frac{d\mathbf{M}}{dt} = -\mathbf{R} \cdot (\mathbf{M} - \mathbf{M}_{\text{eq}}) \quad (\text{S7})$$

so that

$$\mathbf{M}(t) - \mathbf{M}_{\text{eq}} = \exp(-\mathbf{R}t) \cdot (\mathbf{M}(0) - \mathbf{M}_{\text{eq}}) \quad (\text{S8})$$

In the presence of a rigid macromolecule with  $N$  atoms of the  $^1\text{H}$  nuclide, the relaxation matrix becomes

$$\mathbf{R} = \begin{pmatrix} \rho_1 & \sigma_{12} & \sigma_{13} & \dots & \sigma_{1N} \\ \sigma_{12} & \rho_2 & \sigma_{23} & \dots & \sigma_{2N} \\ \sigma_{13} & \sigma_{23} & \rho_3 & \dots & \sigma_{3N} \\ \vdots & \vdots & \vdots & \dots & \vdots \\ \sigma_{1N} & \sigma_{2N} & \sigma_{3N} & \dots & \rho_N \end{pmatrix} \quad (\text{S9})$$

where

$$\rho_i = \sum_{j=1, j \neq i}^N \rho_{ij} \quad (\text{S10})$$

with (see Eqs. 2)

$$\rho_{ij} = \frac{2}{15} \left( \frac{\mu_0}{4\pi} \frac{\hbar \gamma_I^2}{r_{ij}^3} \right)^2 I(I+1) \left[ \tau_c + \frac{3\tau_c}{1+\omega_I^2 \tau_c^2} + \frac{6\tau_c}{1+4\omega_I^2 \tau_c^2} \right] \quad (\text{S11})$$

if the  $i$ th and  $j$ th spin systems are magnetically non-equivalent (unlike spins), or by

$$\rho_{ij} = \frac{2}{5} \left( \frac{\mu_0}{4\pi} \frac{\hbar \gamma_I^2}{r_{ij}^3} \right)^2 I(I+1) \left[ \frac{\tau_c}{1+\omega_I^2 \tau_c^2} + \frac{4\tau_c}{1+4\omega_I^2 \tau_c^2} \right] \quad (\text{S12})$$

(corresponding to  $\rho^I + \sigma^{IJ}$ , see Eqs. 2a and 3), if  $i$ th and  $j$ th spin systems are magnetically equivalent (like spins), as, e.g., the methyl protons. The off-diagonal elements are

$$\sigma_{ij} = \frac{2}{15} \left( \frac{\mu_0}{4\pi} \frac{\hbar \gamma_I^2}{r_{ij}^3} \right)^2 I(I+1) \left[ \frac{6\tau_c}{1+4\omega_I^2 \tau_c^2} - \tau_c \right] \quad (\text{S13})$$

Since  $\mathbf{R}$  is a symmetric matrix, it can be diagonalized and written in the form

$$\mathbf{R} = \boldsymbol{\chi} \cdot \boldsymbol{\lambda} \cdot \boldsymbol{\chi}^{-1} \quad (\text{S14})$$

where  $\boldsymbol{\lambda}$  is the diagonal matrix of eigenvalues and  $\boldsymbol{\chi}$  is the unitary eigenvector matrix. The program CORMA (Borgias et al., 1989) can be used to perform these calculations by providing the macromolecular structure in input.

From Eqs. 8 and 14, the time dependence of the  $z$ -component of the magnetization of each nuclear spin of the macromolecule can be calculated from the expression

$$\mathbf{M}(t) - \mathbf{M}_{\text{eq}} = \boldsymbol{\chi} \cdot \exp(-\boldsymbol{\lambda}t) \cdot \boldsymbol{\chi}^{-1} \cdot (\mathbf{M}(0) - \mathbf{M}_{\text{eq}}) \quad (\text{S15})$$

where

$$\exp(-\boldsymbol{\lambda}t) = \begin{pmatrix} \exp(-\lambda_1 t) & 0 & 0 & \dots & 0 \\ 0 & \exp(-\lambda_2 t) & 0 & \dots & 0 \\ 0 & 0 & \exp(-\lambda_3 t) & \dots & 0 \\ \vdots & \vdots & \vdots & \dots & \vdots \\ 0 & 0 & 0 & \dots & \exp(-\lambda_N t) \end{pmatrix}$$

with  $\lambda_i$  being the eigenvalues of the matrix  $\mathbf{R}$ .

In the presence of chemical exchange, in the limiting case of a single nucleus in chemical exchange with bulk solvent nuclei,

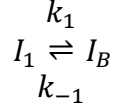

the time evolution of the longitudinal magnetization is given by

$$\frac{d}{dt} \begin{pmatrix} M_Z^I \\ M_Z^B \end{pmatrix} = - \begin{pmatrix} \rho_1^I + k_1 & -k_{-1} \\ -k_1 & \rho_B + k_{-1} \end{pmatrix} \begin{pmatrix} M_Z^I - M_{eq}^I \\ M_Z^B - M_{eq}^B \end{pmatrix}$$

and since at equilibrium  $k_1 P_I = k_{-1} P_B$  ( $P_i$  is the population of the nuclei in position 1 and in the bulk), it results that  $\frac{k_{-1}}{k_1} = \frac{P_I}{P_B} = f$ .

The relaxation rates of the solvent molecule nuclei interacting with the macromolecule and of the bulk solvent molecule nuclei can be calculated by including in the relaxation matrix as many extra rows and columns as the number of nuclei belonging to the interacting solvent molecules, and an additional row and column relative to bulk solvent nuclei. Assuming  $M$  solvent nuclei interacting with the macromolecule (composed of  $N$  nuclei), the relaxation matrix becomes

$$\mathbf{R} = \begin{pmatrix} \rho_1 + k_1 + R_{1M,1} & \sigma_{12} & \dots & \sigma_{1N} & \sigma_{1(N+1)} & \dots & \sigma_{1(N+M)} & -fk_1 \\ \sigma_{12} & \rho_2 + k_2 + R_{1M,2} & \dots & \sigma_{2N} & \sigma_{2(N+1)} & \dots & \sigma_{2(N+M)} & -fk_2 \\ \vdots & \vdots & \ddots & \vdots & \vdots & \ddots & \vdots & \vdots \\ \sigma_{1N} & \sigma_{2N} & \dots & \rho_N + k_N + R_{1M,N} & \sigma_{N(N+1)} & \dots & \sigma_{N(N+M)} & -fk_N \\ \sigma_{1(N+1)} & \sigma_{2(N+1)} & \dots & \sigma_{N(N+1)} & \rho_{N+1} + k_{N+1} + R_{1M,N+1} & \dots & \sigma_{(N+1)(N+M)} & -fk_{N+1} \\ \vdots & \vdots & \ddots & \vdots & \vdots & \ddots & \vdots & \vdots \\ \sigma_{1(N+M)} & \sigma_{2(N+M)} & \dots & \sigma_{N(N+M)} & \sigma_{(N+1)(N+M)} & \dots & \rho_{N+M} + k_{N+M} + R_{1M,N+M} & -fk_{N+M} \\ -k_1 & -k_2 & \dots & -k_N & -k_{N+1} & \dots & -k_{N+M} & \rho_B + f \sum_i k_i \end{pmatrix} \quad (\text{S16})$$

where  $k_i = (\tau_{M,i})^{-1}$  are the exchange rate constants,  $f$  is the ratio between the macromolecular concentration and the solvent molecule nuclei concentration, and  $\rho_B$  is the relaxation rate of bulk solvent nuclei in the absence of the macromolecule. The coefficient  $f$  in the last column originates from the relationship  $k_{-1} = fk_1$  (see above).

Finally, using a “normalized” magnetization for the bulk nuclei,  $\mathbf{M}' = \begin{pmatrix} M_z^I \\ \vdots \\ fM_z^B \end{pmatrix} = \begin{pmatrix} M_z^I \\ \vdots \\ \tilde{M}_z^B \end{pmatrix}$ , the

relaxation matrix becomes

$$\mathbf{R}' = \begin{pmatrix} \rho_1 + k_1 + R_{1M,1} & \sigma_{12} & \dots & \sigma_{1N} & \sigma_{1(N+1)} & \dots & \sigma_{1(N+M)} & -k_1 \\ \sigma_{12} & \rho_2 + k_2 + R_{1M,2} & \dots & \sigma_{2N} & \sigma_{2(N+1)} & \dots & \sigma_{2(N+M)} & -k_2 \\ \vdots & \vdots & \ddots & \vdots & \vdots & \ddots & \vdots & \vdots \\ \sigma_{1N} & \sigma_{2N} & \dots & \rho_N + k_N + R_{1M,N} & \sigma_{N(N+1)} & \dots & \sigma_{N(N+M)} & -k_N \\ \sigma_{1(N+1)} & \sigma_{2(N+1)} & \dots & \sigma_{N(N+1)} & \rho_{N+1} + k_{N+1} + R_{1M,N+1} & \dots & \sigma_{(N+1)(N+M)} & -k_{N+1} \\ \vdots & \vdots & \ddots & \vdots & \vdots & \ddots & \vdots & \vdots \\ \sigma_{1(N+M)} & \sigma_{2(N+M)} & \dots & \sigma_{N(N+M)} & \sigma_{(N+1)(N+M)} & \dots & \rho_{N+M} + k_{N+M} + R_{1M,N+M} & -k_{N+M} \\ -fk_1 & -fk_2 & \dots & -fk_N & -fk_{N+1} & \dots & -fk_{N+M} & \rho_B + f \sum_i k_i \end{pmatrix} \quad (\text{S17})$$

Bertini, I., Luchinat, C., Parigi, G. and Ravera, E.: NMR of paramagnetic molecules: applications to metallobiomolecules and models., 2017.

Borgias, B., Thomas, P. D. and James, T. L.: Complete Relaxation Matrix Analysis (CORMA)., University of California, San Francisco, CA., 1989.

Solomon, I.: Relaxation Processes in a System of Two Spins, Phys. Rev., 99(2), 559–565, doi:10.1103/PhysRev.99.559, 1955.

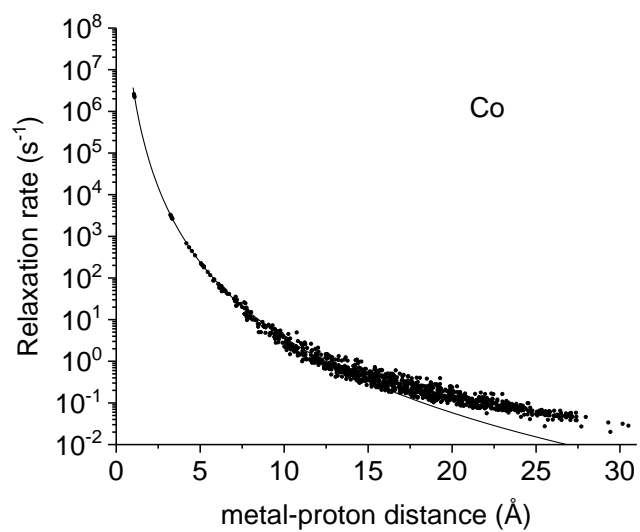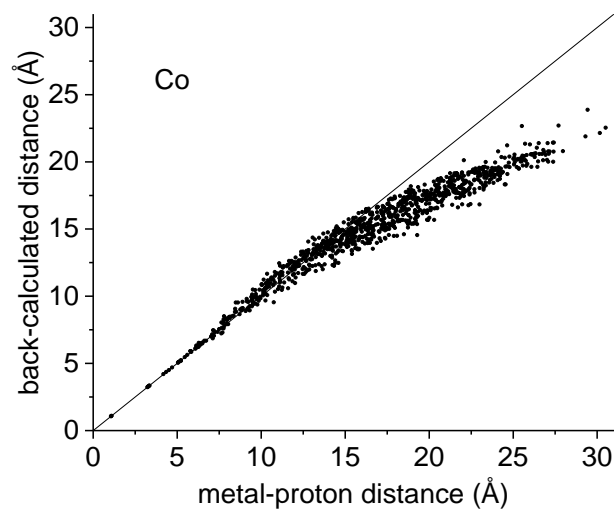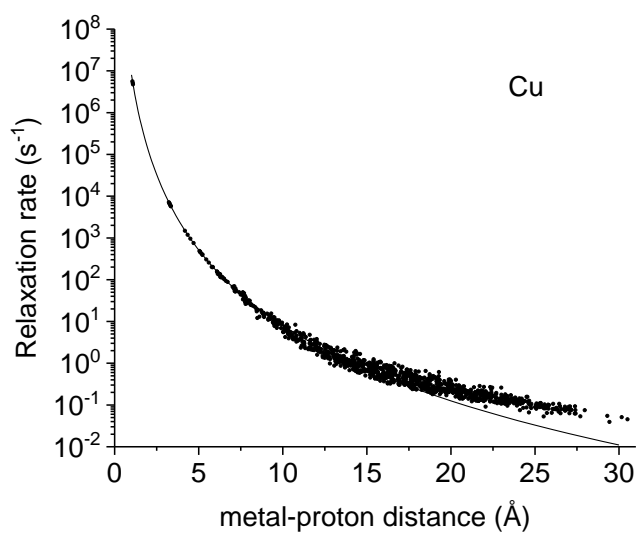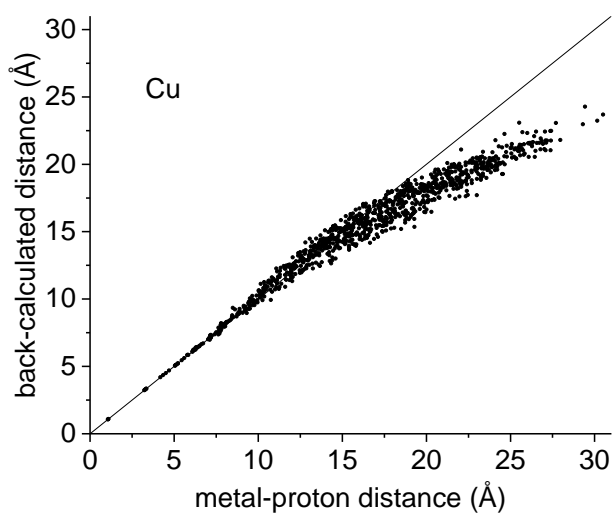

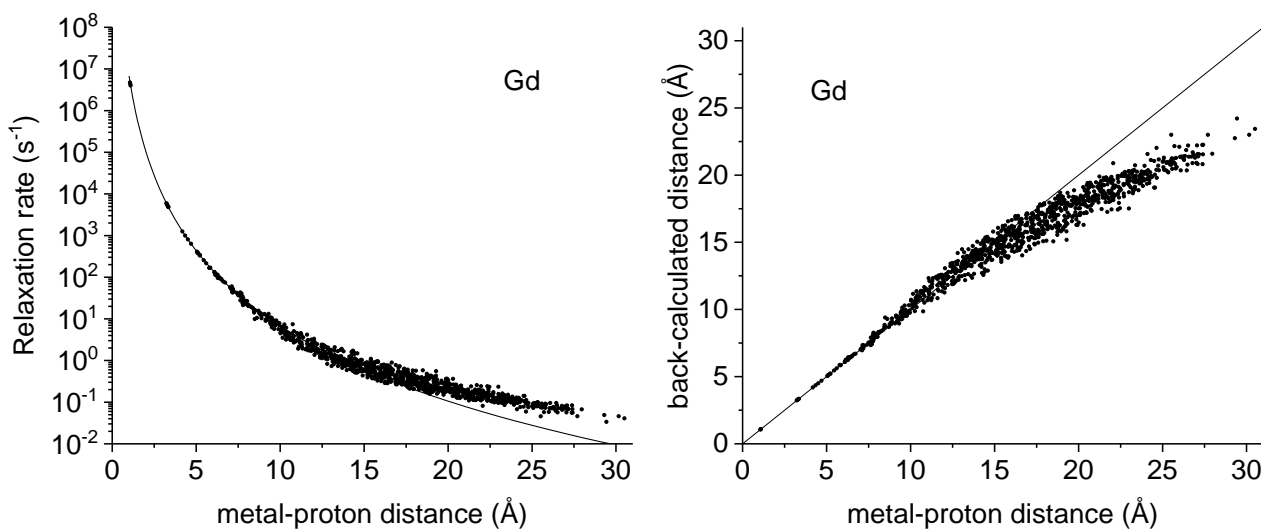

Figure S1. (left panels) Paramagnetic relaxation rates calculated at 700 MHz for MMP-12 protons, with a reorientation time of 12 ns, in the presence of high spin cobalt(II) (with an electron relaxation rate of 10 ps), copper(II) (with an electron relaxation rate of 0.17 ns), or gadolinium(III) ions (with an electron relaxation rate of 1  $\mu$ s), replaced to the catalytic zinc(II) ion. The lines indicate the rates predicted with the Solomon equation. (right panels) Agreement between metal-proton distances as measured in the PDB 5LAB structure and back-calculated from the predicted  $R_1$ .

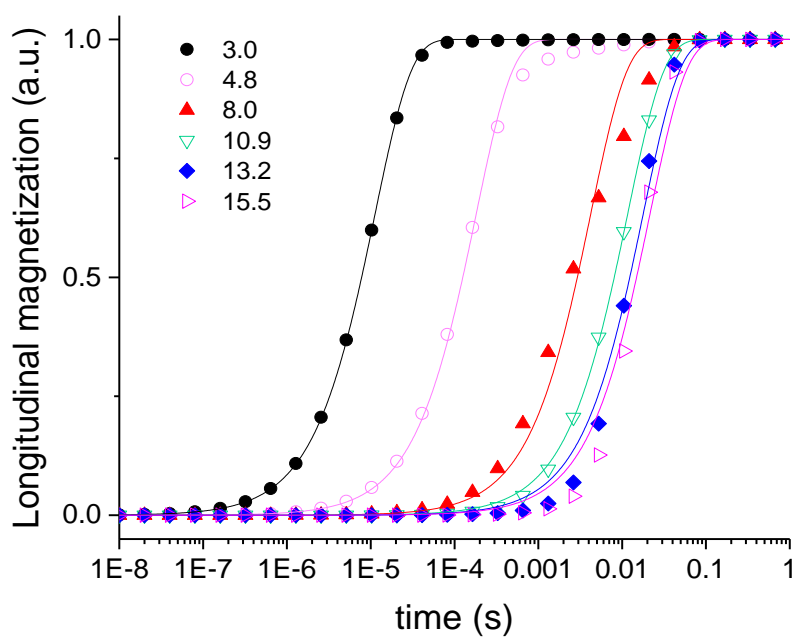

Figure S2. Magnetization recovery after a  $90^\circ$  pulse for protons at 3.0, 4.8, 8.0, 10.9, 13.2 and 15.5 Å from a  $\text{Gd}^{3+}$  ion, with electron relaxation time of 36 ns, in a macromolecule with a reorientation time of 500 ns, at 3 T. The lines indicate the monoexponential fit of the data.



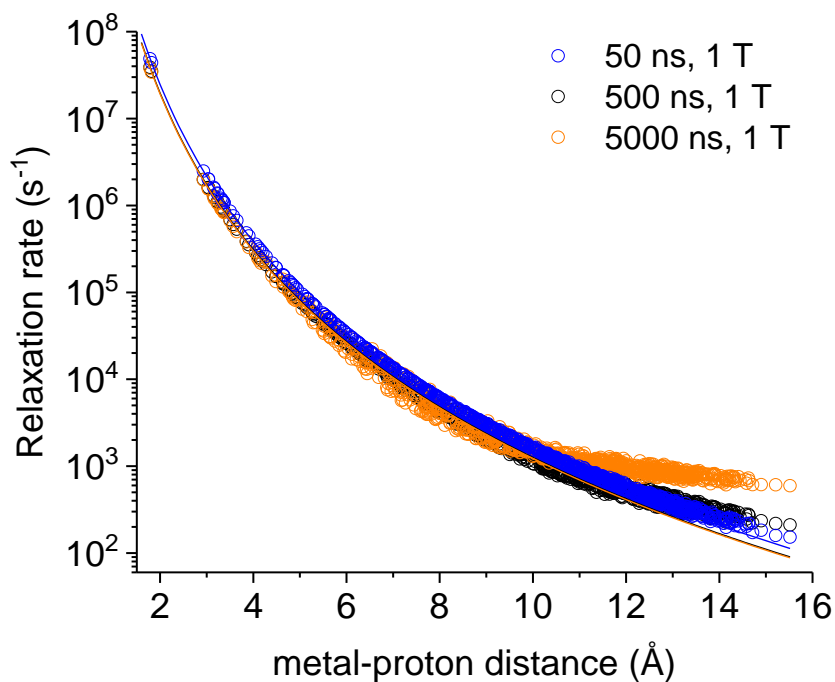

Figure S3. Relaxation rates calculated at 1 T for protons at different distance from a  $\text{Gd}^{3+}$  ion with electron relaxation time of 17 ns in the macromolecular model with reorientation time of 50, 500 or 5000 ns. The lines indicate the Solomon relaxation rates calculated for the same reorientation times (colored accordingly). The relaxation rate is calculated assuming  $\Delta_t = 0.015 \text{ cm}^{-1}$  and  $\tau_v = 20 \text{ ps}$ , instead of  $\Delta_t = 0.030 \text{ cm}^{-1}$  and  $\tau_v = 20 \text{ ps}$ , that provide 4.2 ns at 1 T.

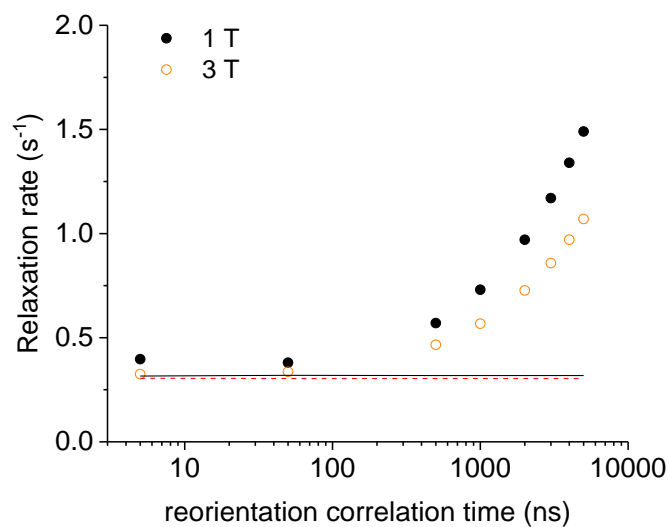

Figure S4. Bulk water proton relaxation rates calculated at 1 and 3 T as a function of the reorientation time of the macromolecular model (at 0.001 mol dm<sup>-3</sup> concentration) with a  $S = 1/2$  ion and electron relaxation time of 4 ns, with 100 surface protons with exchange rate of 0.1 ms. The bulk water proton relaxation rates calculated with the Solomon equation at 1 and 3 T are shown as solid and dashed lines, respectively. In all calculations, an intrinsic diamagnetic rate of 0.3 s<sup>-1</sup> is assumed.

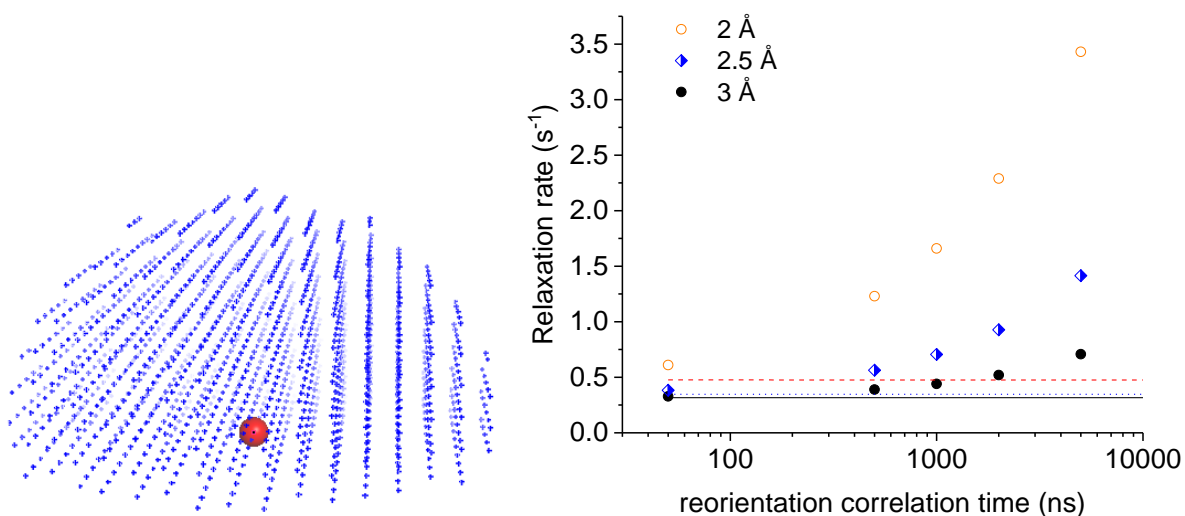

Figure S5. (A) Half-spherical structural model with protons in octahedral geometry and the metal ion (red sphere) in the center. (B) Bulk water proton relaxation rates at 1 T as a function of the reorientation time of a macromolecular sphere containing a Gd<sup>3+</sup>-ion in the center and protons at distances of 2, 2.5 or 3 Å (see panel A), with 100 surface protons with exchange rate of 0.1 ms. The bulk water proton relaxation rates calculated with the Solomon equation are shown as lines. In all calculations, an intrinsic diamagnetic rate of 0.3 s<sup>-1</sup> is assumed. The electron relaxation time of gadolinium is calculated assuming the typical values for the electron relaxation parameters,  $\Delta_t = 0.030$  cm<sup>-1</sup> and  $\tau_V = 20$  ps.
